# Supplementary material for: Differences in spatial distribution between WHO 2016 low-grade glioma molecular subgroups
Source: Oxford University Press journal article supplement (doi:10.1093/noajnl/vdz001), 2019-05-01
Supplement: vdz001_suppl_supplementary_figures.pdf [file vdz001_suppl_supplementary_figures.pdf]

# Supplementary Figure 1

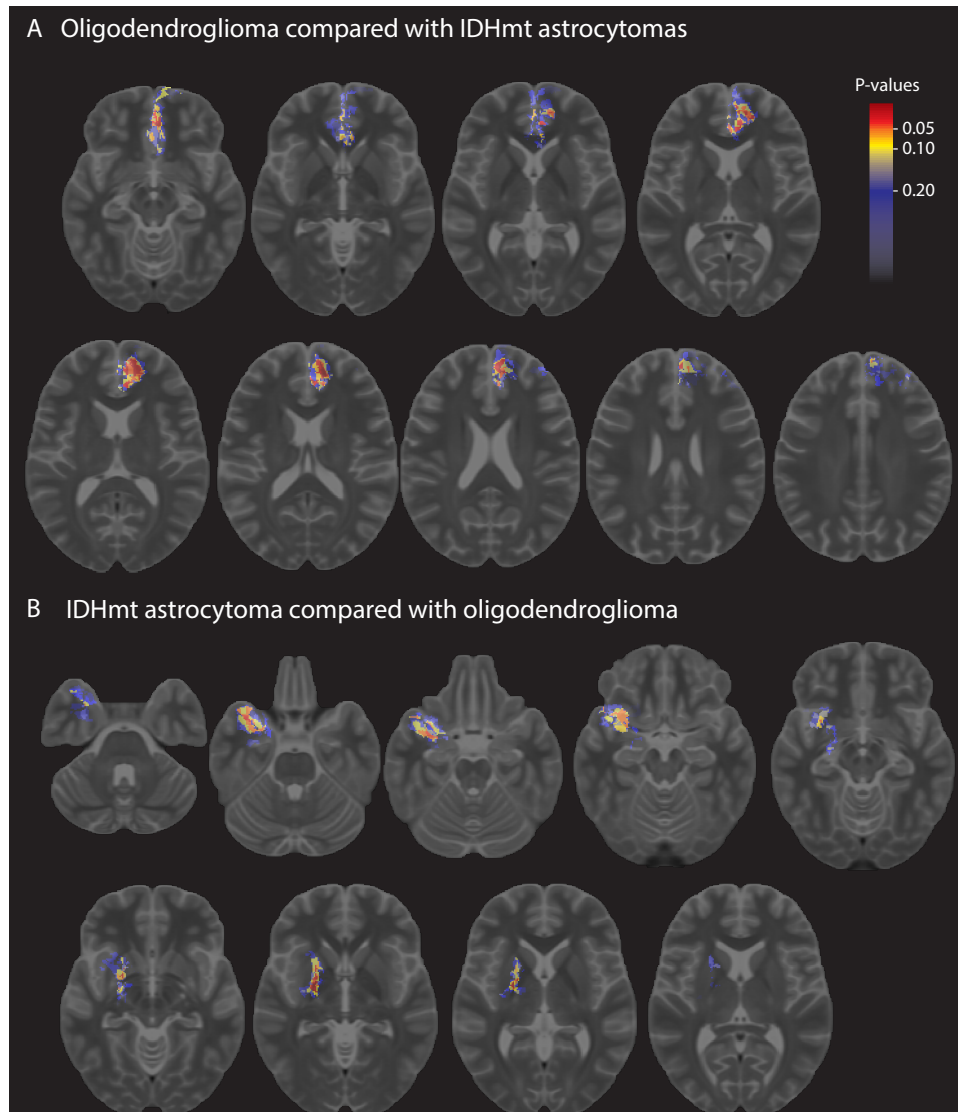

Results of voxelwise permutation testing with 15000 permutations for statistical differences in location distribution. The color of a voxel indicates the p-value as indicated in the top-right color bar; (a) heatmap of significantly more frequent occurring localizations for oligodendroglioma compared with IDH mutated astrocytomas (b) heatmap of significantly more frequent occurring localizations for IDH mutated astrocytomas compared with oligodendrogliomas

## Supplementary Figure 2

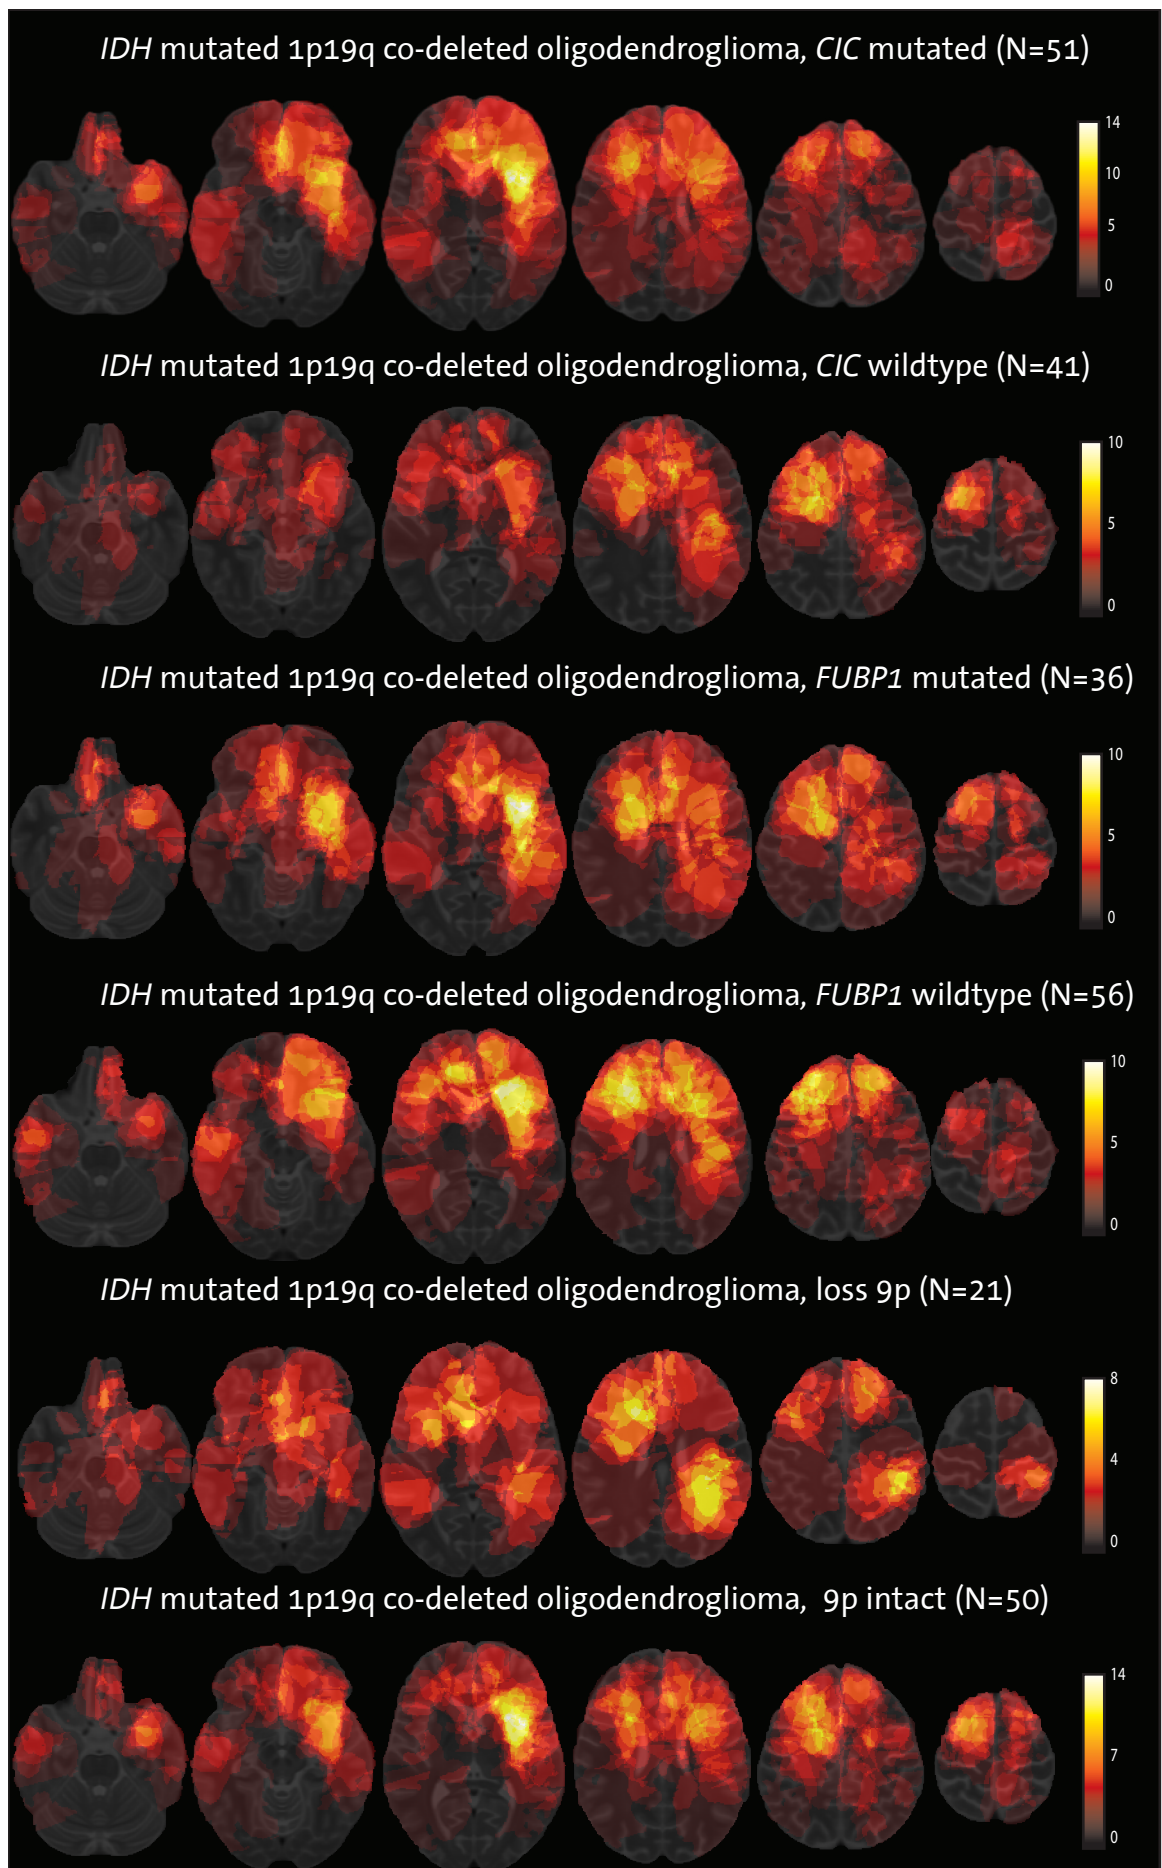

Spatial distribution heatmaps of presence of individual gene or copy number alterations in the context of oligodendroglioma.

## Supplementary Figure 3

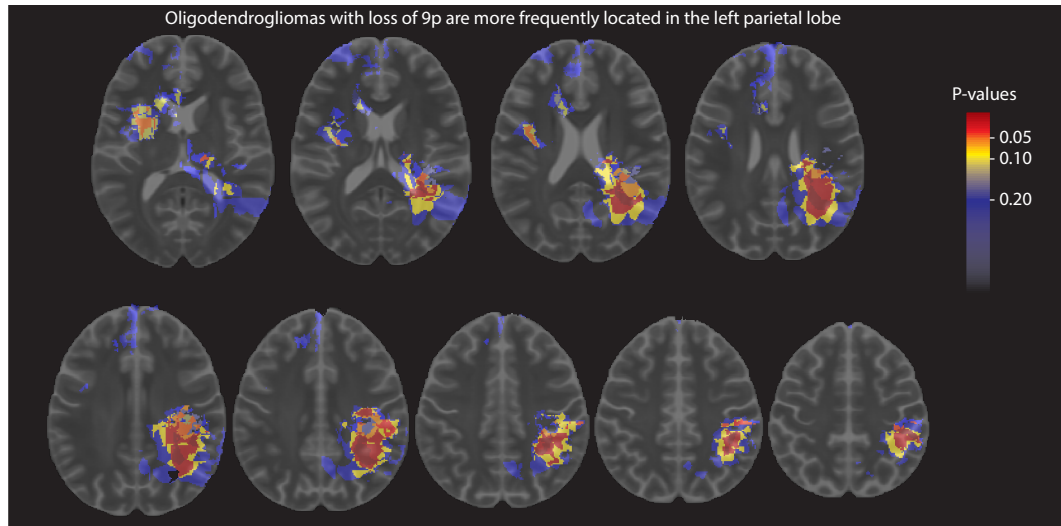

Results of voxelwise permutation testing showing significant more frequently occurring localizations for loss of 9p in the context of oligodendroglioma, compared with 9p intact oligodendroglioma.

## Supplementary Figure 4

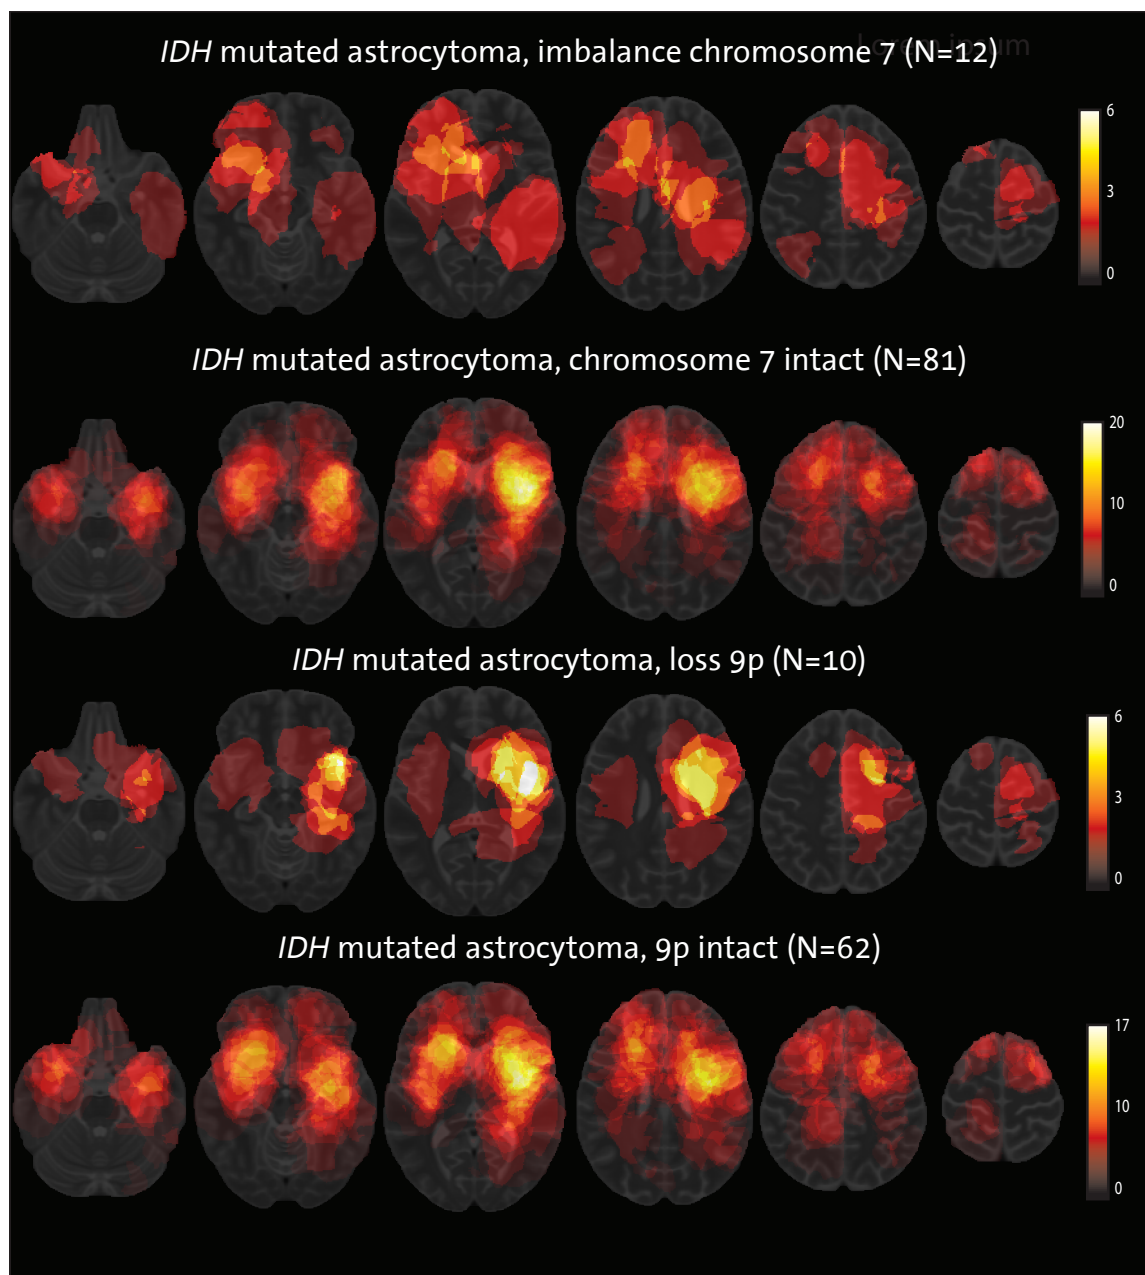

Spatial distribution heatmaps of presence of individual copy number alterations in the context of *IDH* mutated astrocytoma.
